# Supplementary material
Source: PubMed Central journal article supplement (PMC9429594)

## BASKET TRIAL

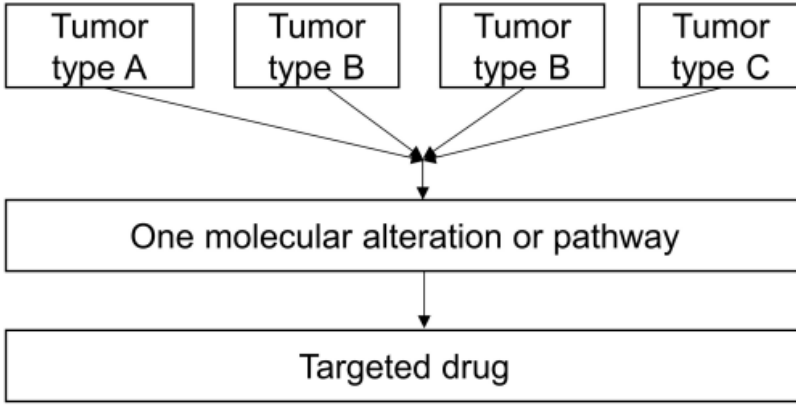

## UMBRELLA TRIAL

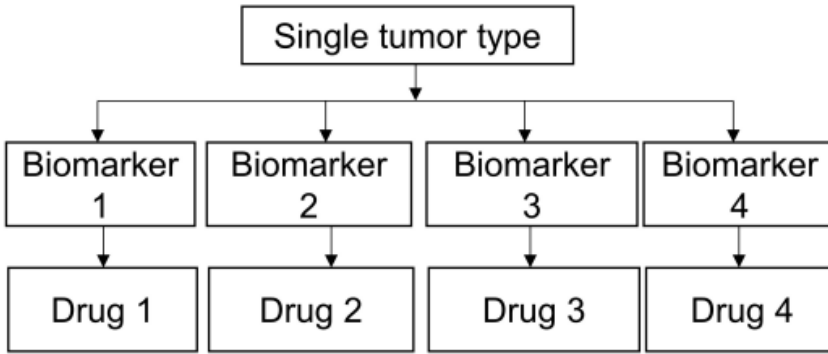

## COMPLETE PHASE I TRIAL

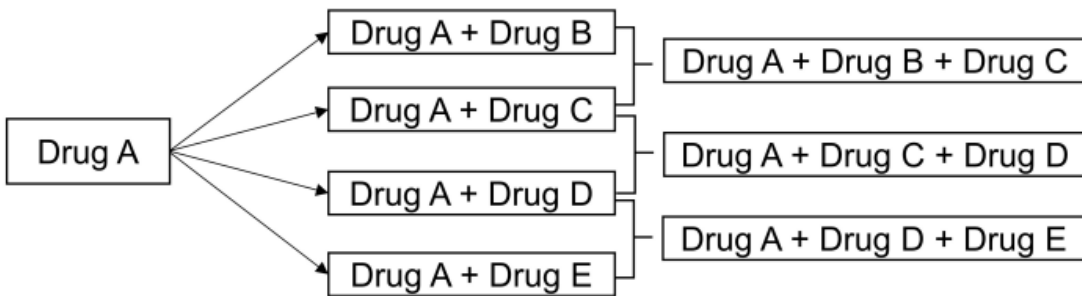

## OCTOPUS TRIAL

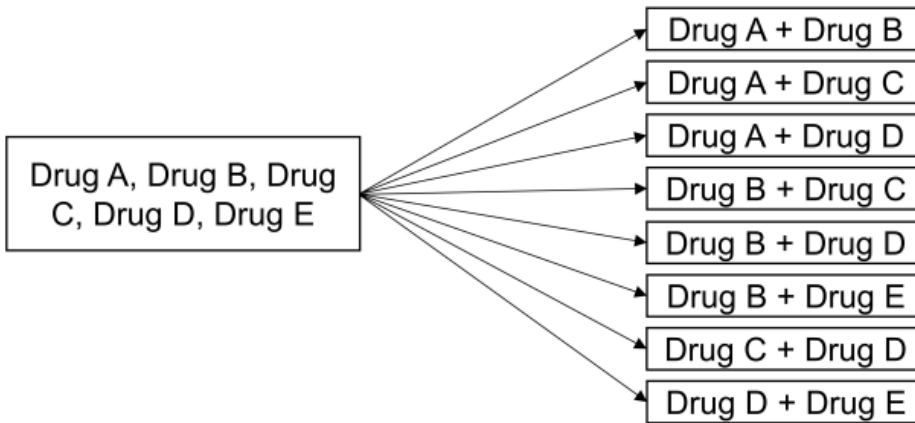

## TELESCOPE (SEAMLESS) TRIAL

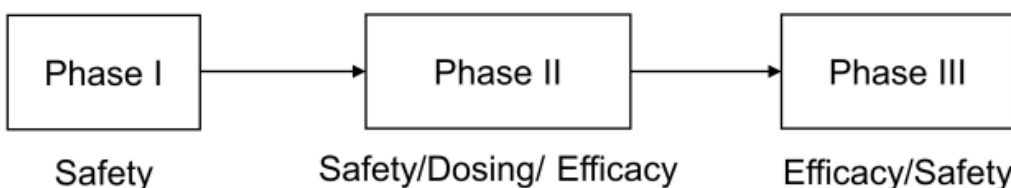

Supplement: 13073_2022_1102_MOESM1_ESM.pdf [file 13073_2022_1102_MOESM1_ESM.pdf]
