# Supplementary material
Source: PubMed Central journal article supplement (PMC9429594)

## N-of-1 TRIAL

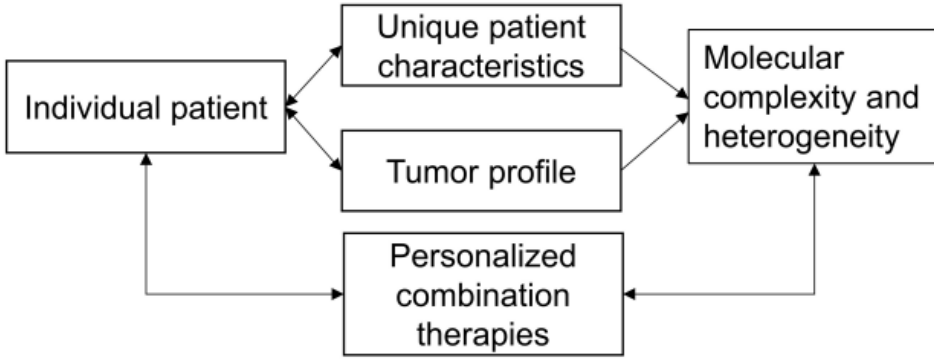

## HOME-BASED TRIAL

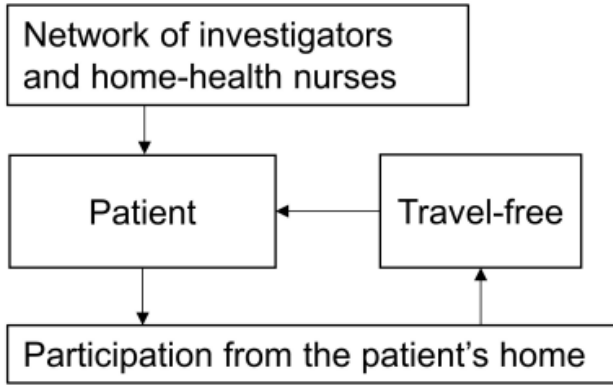

## PATIENT-REPORTED OUTCOME MEASURES

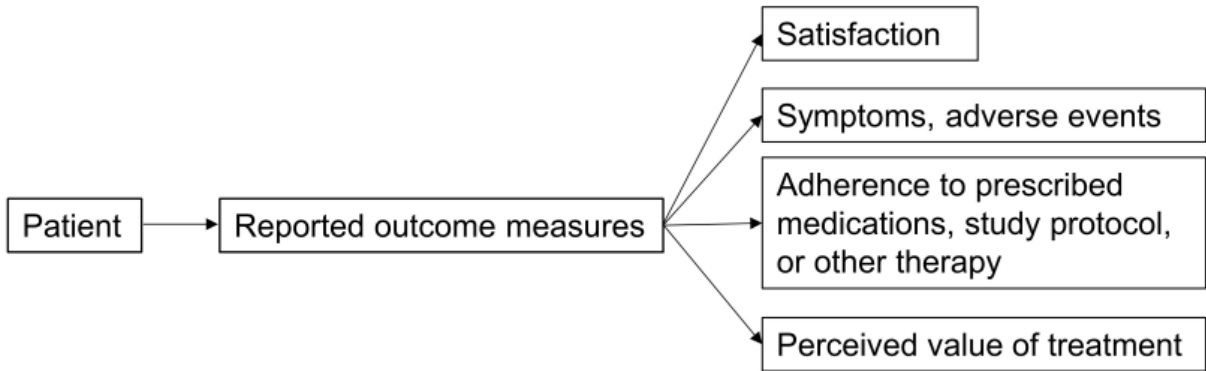

## REGISTRY TRIAL

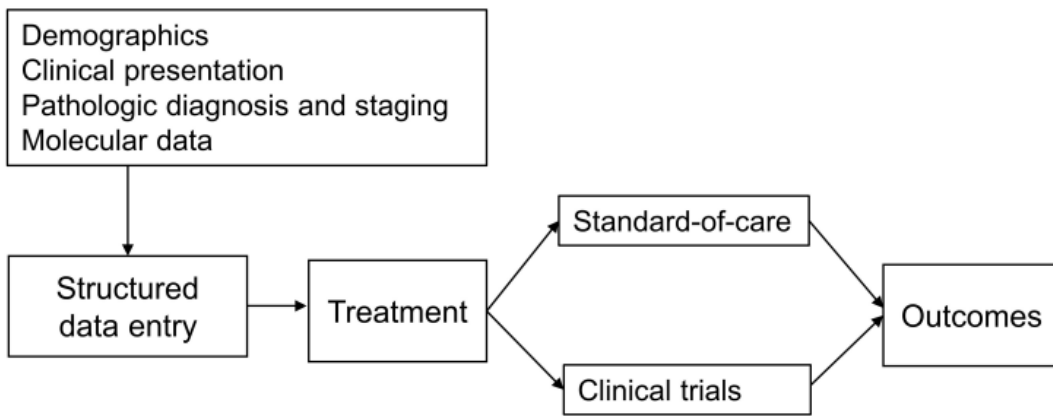

## REAL-WORLD DATA

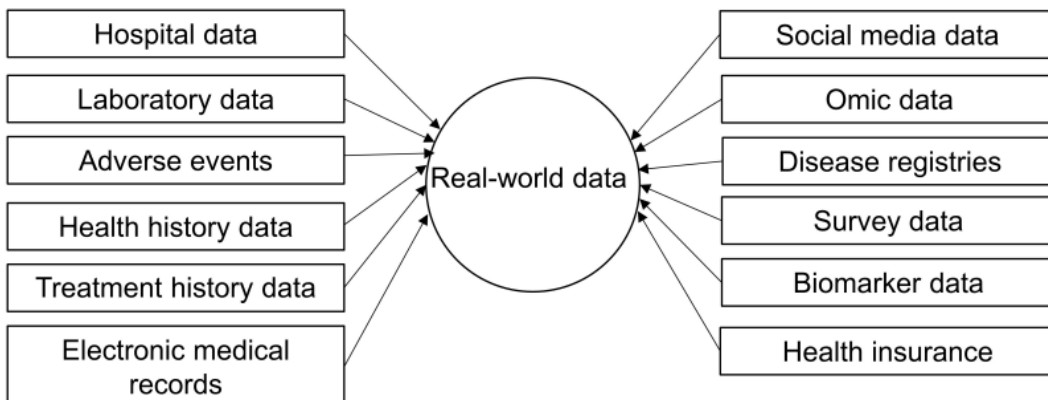

Supplement: 13073_2022_1102_MOESM2_ESM.pdf [file 13073_2022_1102_MOESM2_ESM.pdf]
